# Supplementary material for: Control of growth mode and crystallinity of aluminium-doped zinc oxide thin film at room temperature by self-assembled monolayer assisted modulation on substrate surface energy
Source: Royal Society of Chemistry journal article supplement (doi:10.1039/c3ce40781k), 2013-01-01
Supplement: c3ce40781k.pdf [file c3ce40781k.pdf]

Electronic supplementary information. (ESI)

**Control of Growth Mode and Crystallinity of Aluminum Doped  
Zinc Oxide Thin Film at Room Temperature by Self-Assembled  
Monolayer Assisted Modulation on Substrate Surface Energy**

Thieu Thi Tien Vo<sup>1</sup>, Yu-Hsuan Ho<sup>1</sup>, Pao-Hung Lin<sup>2</sup>, and Yian Tai<sup>1\*</sup>

*<sup>1</sup>Department of Chemical Engineering, National Taiwan University of Science and  
Technology, Taipei, Taiwan*

*<sup>2</sup>Department of Electronic and Computer Engineering, National Taiwan University of  
Science and Technology, Taipei, Taiwan*

\*Corresponding Author:

Prof. Yian Tai

Department of Chemical Engineering, National Taiwan University of Science and  
Technology, 43 Keelung Road Sec. 4, Taipei 106, Taiwan.

Phone: +886-2-2737-6620, Fax: +886-2-2737-6644

E-mail: [ytai@mail.ntust.edu.tw](mailto:ytai@mail.ntust.edu.tw)

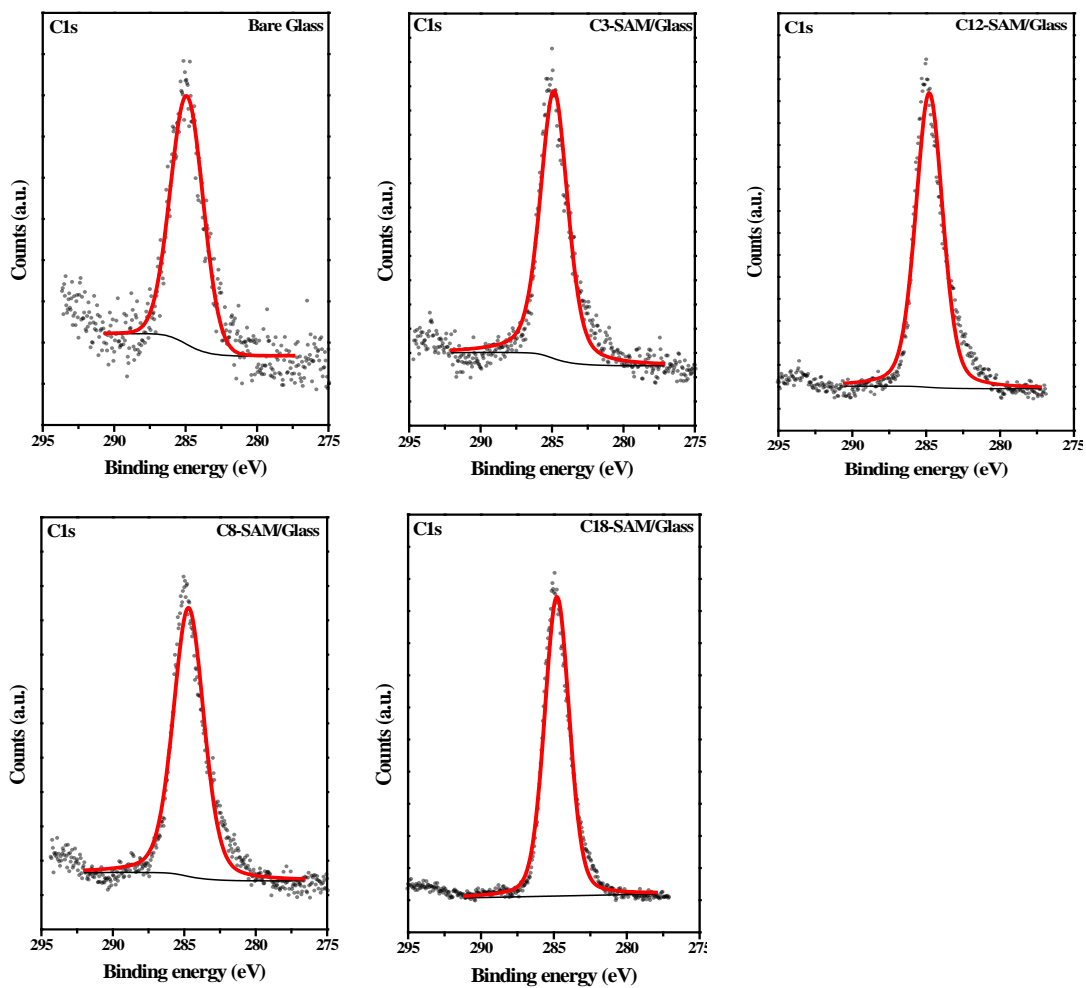

**Figure S1.** C1s XPS spectra of pristine and various alkylsilane SAMs modified glass substrates.

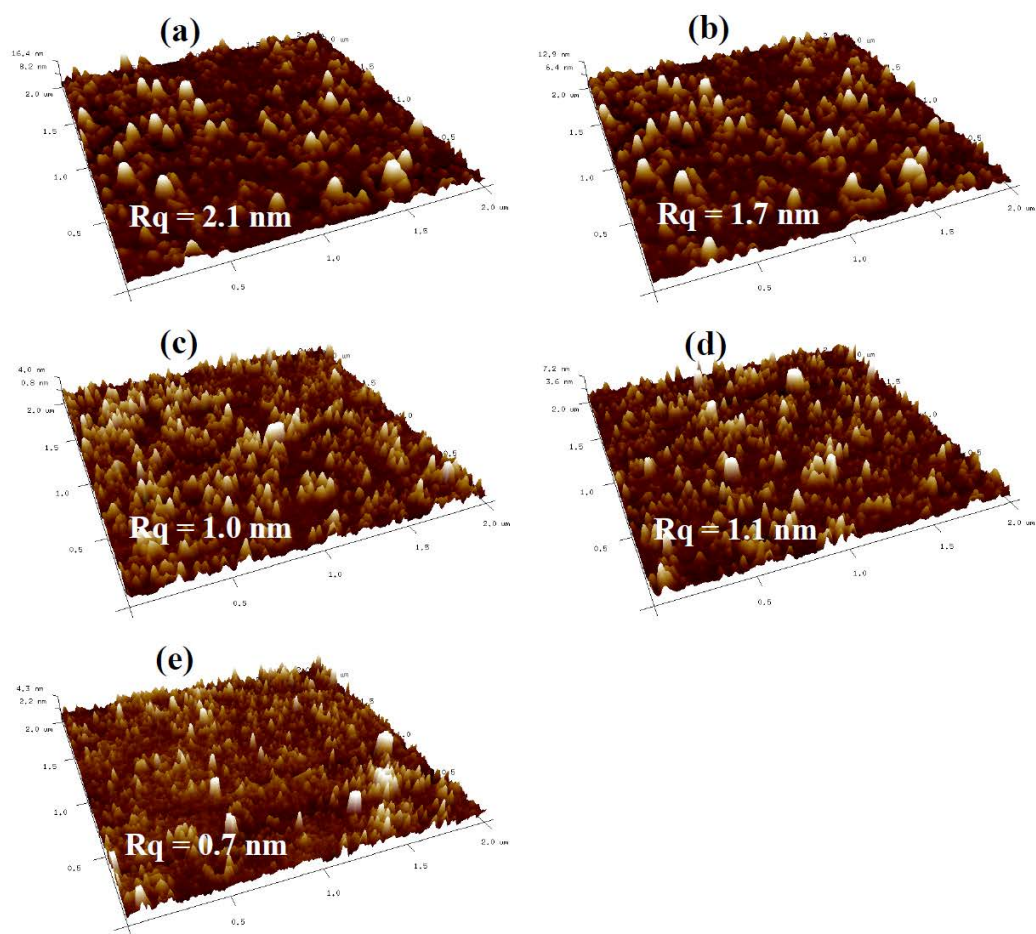

**Figure S2.** AFM images and surface roughness of (a) pristine, (b) C3-SAM, (c) C8-SAM, (d) C12-SAM, and (e) C18-SAM modified glass substrates.

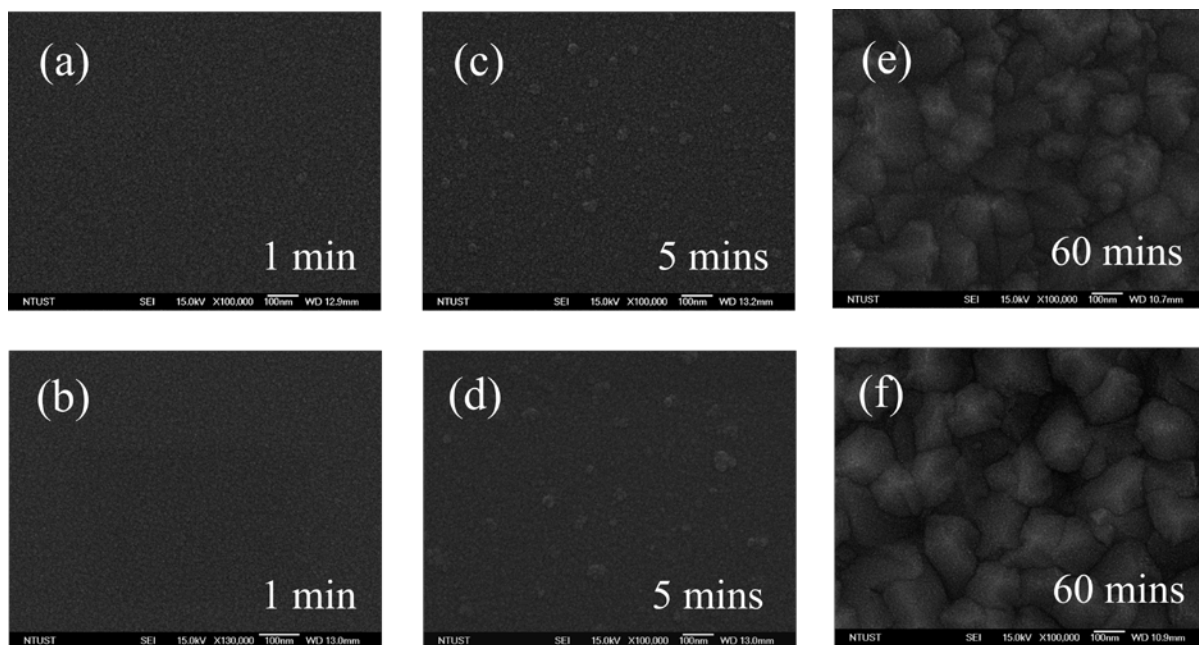

**Figure S3.** SEM images of AZO films deposited at different deposition time 1, 5 and 60 minutes on C8-SAM ((a), (c), and (e)) and C12-SAM ((b), (d), and (f)) modified glass substrates.

**Table S1.** The optical bangap of AZO thin films deposited on pristine and various alkylsilane SAMs modified glass substrates.

| AZO films  | AZO/glass | AZO/C3/glass | AZO/C8/glass | AZO/C12/glass | AZO/C18/glass |
|------------|-----------|--------------|--------------|---------------|---------------|
| $E_g$ (eV) | 3.34      | 3.35         | 3.36         | 3.37          | 3.37          |
